# Supplementary material for: Metabolomic Evaluation of Tissue-Specific Defense Responses in Tomato Plants Modulated by PGPR-Priming against Phytophthora capsici Infection
Source: MDPI journal article supplement (doi:10.3390/plants10081530), 2021-07-26
Supplement: s1 [file s1]

# Metabolomic evaluation of tissue-specific defense responses modulated by PGPR-treatment against *Phytophthora capsici* in tomato plants

Msizi I. Mhlongo<sup>1</sup>, Lizelle A. Piater<sup>1</sup>, Paul A. Steenkamp<sup>1</sup> Nico Labuschagne<sup>2</sup> and Ian A. Dubery<sup>1\*</sup>

<sup>1</sup> Research Centre for Plant Metabolomics, Department of Biochemistry, University of Johannesburg, Auckland Park, 2006, Johannesburg, South Africa; <sup>2</sup> Department of Plant and Soil Sciences, University of Pretoria, 0028, South Africa.

\*Correspondence: E-mail: idubery@uj.ac.za; Tel.: +27-11-559-2401.

---

## Supplementary Files –

**Table S1.** One-way ANOVA comparing mean values of quantified aromatic amino acids and phytohormones in PGPR-primed-unchallenged *vs.* PGPR-primed-challenged tomato plant tissues.

**Table S2.** Annotation of individual internal standard, amino acids and phytohormones by retention time, *m/z* values and identification by MS/MS fragmentation patterns.

**Table S3.** Parameters of the calibration curves for each amino acid and phytohormone: analytical range, regression, limit of detection (LOD) and limit of quantification (LOQ).

**Table S4.** Percentage of recovery of abscisic acid and methyl salicylate during phytohormone extraction from tomato plant tissue.

**Table S5.** Post-hoc tests comparing mean values of quantified aromatic amino acids and phytohormones in PGPR-primed-unchallenged *vs.* PGPR-primed-challenged tomato plant tissues.

**Table S6.** Summary of annotated (MSI-level 2) metabolites that contributed to the discriminating variability in the altered metabolomes (as described by chemometric models).

**Figure S1.** Representative BPI MS chromatograms of extracts from **leaf** tissue from primed-unchallenged (*Paenibacillus alvei* T22 NT), and primed-challenged (*Paenibacillus alvei* T22 PC) tomato plants.

**Figure S2.** Representative BPI MS chromatograms of extracts from **stem** tissue from primed-unchallenged (*Paenibacillus alvei* T22 NT) and primed-challenged (*Paenibacillus alvei* T22 PC) tomato plants.

**Figure S3.** Representative BPI MS chromatograms of extracts from **root** tissue from primed-unchallenged (*Paenibacillus alvei* T22 NT) and primed-challenged (*Paenibacillus alvei* T22 PC) tomato plants.

**Figure S4.** Unsupervised statistical analysis of tomato **leaf** data acquired in ESI<sup>+</sup> mode comparing primed by *Pa. alvei* T22 and primed-challenged plants.

**Figure S5.** Unsupervised statistical analysis of tomato **stem** data acquired in ESI<sup>+</sup> mode comparing primed by *Pa. alvei* T22 and primed-challenged plants.

**Figure S6.** Unsupervised statistical analysis of tomato stem data acquired in ESI<sup>+</sup> mode comparing primed by *Pa. alvei* T22 and primed-challenged plants.

**Figure S7.** Unsupervised statistical analysis of tomato root data acquired in ESI<sup>-</sup> mode comparing primed by *Pa. alvei* T22 and primed-challenged plants.

**Figure S8.** Unsupervised statistical analysis of tomato root data acquired in ESI<sup>+</sup> mode comparing primed by *Pa. alvei* T22 and primed-challenged plants.

**Figure S9.** OPLS-DA modeling and variable/feature selection of leaf data acquired in ESI<sup>+</sup> mode comparing primed (*Paenibacillus alvei* T22 NT) and primed-challenged (*Paenibacillus alvei* T22 PC) plants.

**Figure S10.** OPLS-DA modeling and variable/feature selection of stem data acquired in ESI<sup>-</sup> mode comparing primed (*Paenibacillus alvei* T22 NT) and primed-challenged (*Paenibacillus alvei* T22 PC) plants.

**Figure S11.** OPLS-DA modeling and variable/feature selection of stem data acquired in ESI<sup>+</sup> mode comparing primed (*Paenibacillus alvei* T22 NT) and primed-challenged (*Paenibacillus alvei* T22 PC) plants.

**Figure S12.** OPLS-DA modeling and variable/feature selection of root data acquired in ESI<sup>-</sup> mode comparing primed (*Paenibacillus alvei* T22 NT) and primed-challenged (*Paenibacillus alvei* T22 PC) plants.

**Figure S13.** OPLS-DA modeling and variable/feature selection of root data acquired in ESI<sup>+</sup> mode comparing primed (*Paenibacillus alvei* T22 NT) and primed-challenged (*Paenibacillus alvei* T22 PC) plants.

**Table S1. One-way ANOVA comparing mean values of quantified aromatic amino acids and phytohormones in PGRP-primed-unchallenged vs. PGPR-primed-challenged tomato plant tissues.**

| Compound name | N04-primed-unchallenged vs. N04-primed-challenged<br><i>p</i> -value | T22-primed-unchallenged vs. T22-primed-challenged<br><i>p</i> -value |
|---------------|----------------------------------------------------------------------|----------------------------------------------------------------------|
| <b>Roots</b>  |                                                                      |                                                                      |
| Phe           | 0.000                                                                | 0.000                                                                |
| Trp           | 0.000                                                                | 0.000                                                                |
| Tyr           | 0.000                                                                | 0.000                                                                |
| ABA           | 0.225                                                                | 0.001                                                                |
| MeSA          | 0.000                                                                | 0.000                                                                |
| <b>Stems</b>  |                                                                      |                                                                      |
| Phe           | 0.000                                                                | 0.000                                                                |
| Trp           | 0.000                                                                | 0.000                                                                |
| Tyr           | 0.000                                                                | 0.000                                                                |
| ABA           | 0.000                                                                | 0.000                                                                |
| MeSA          | 0.002                                                                | 0.000                                                                |
| <b>Leaves</b> |                                                                      |                                                                      |
| Phe           | 0.000                                                                | 0.000                                                                |
| Trp           | 0.000                                                                | 0.000                                                                |
| Tyr           | 0.000                                                                | 0.000                                                                |
| ABA           | 0.001                                                                | 0.001                                                                |
| MeSA          | 0.000                                                                | 0.000                                                                |

**Table S2. Annotation of individual internal standard, amino acids and phytohormones by retention time, *m/z* values and identification by MS/MS fragmentation patterns. LC-ESI-MS/MS analyses were performed on a UHPLC system coupled to a triple quadrupole mass spectrometer operating in positive ion mode.**

| No. | Analyte | Pseudo-molecular ions | Rt (min) | <i>m/z</i> | Fragment ions ( <i>m/z</i> ) observed in MRM mode and relative intensity (%) | Quadrupole 1 (Q1), V       | Collision energy (CE), V   |
|-----|---------|-----------------------|----------|------------|------------------------------------------------------------------------------|----------------------------|----------------------------|
| 1   | Pred    | [M+H] <sup>+</sup>    | 8.30     | 361.00     | 361.00 > 343.25<br>361.00 > 325.20<br>361.00 > 147.15                        | -20.00<br>-20.00<br>-19.00 | -10.00<br>-11.00<br>-22.00 |
| 2   | Phe     | [M+H] <sup>+</sup>    | 1.11     | 166.00     | 166.00 > 120.20<br>166.00 > 103.15<br>166.00 > 77.15                         | -12.00<br>-12.00<br>-12.00 | -15.00<br>-28.00<br>-40.00 |
| 3   | Trp     | [M+H] <sup>+</sup>    | 1.43     | 205.05     | 205.05 > 188.20<br>205.05 > 146.15                                           | -10.00<br>-10.00           | -12.00<br>-19.00           |

|   |      |                    |      |        |                 |        |        |
|---|------|--------------------|------|--------|-----------------|--------|--------|
|   |      |                    |      |        | 205.05 > 118.20 | -10.00 | -26.00 |
| 4 | Tyr  | [M+H] <sup>+</sup> | 0.80 | 182.05 | 182.05 > 91.20  | -13.00 | -30.00 |
|   |      |                    |      |        | 182.05 > 136.20 | -13.00 | -16.00 |
|   |      |                    |      |        | 182.05 > 165.15 | -10.00 | -13.00 |
|   |      |                    |      |        |                 |        |        |
| 5 | ABA  | [M+H] <sup>+</sup> | 7.90 | 265.10 | 265.10 > 247.20 | -20.00 | -8.00  |
|   |      |                    |      |        | 265.10 > 229.30 | -13.00 | -10.00 |
|   |      |                    |      |        | 265.10 > 201.15 | -13.00 | -13.00 |
| 6 | MeSA | [M+H] <sup>+</sup> | 8.95 | 153.00 | 153.00 > 121.20 | -16.00 | -19.00 |
|   |      |                    |      |        | 153.00 > 65.15  | -11.00 | -29.00 |
|   |      |                    |      |        | 153.00 > 93.05  | -11.00 | -24.00 |

**Table S3.** Parameters of the calibration curves for each amino acid and phytohormone: analytical range, regression, limit of detection (LOD) and limit of quantification (LOQ).

| Compound | Range (ng/μL FW) | Curve                                       | R <sup>2</sup> | LOD (ng/μL) | LOQ (ng/μL) |
|----------|------------------|---------------------------------------------|----------------|-------------|-------------|
| Pred     | 0.0001 – 20      | Y = 1.59 <sup>6</sup> X + 717 037           | 99.54          | > 0.001     | 0.001       |
| Phe      | 0.0001 – 20      | Y = 7.98 <sup>6</sup> X + 1.16 <sup>6</sup> | 99.50          | > 0.0001    | 0.0001      |
| Trp      | 0.0001 – 20      | Y = 8.21 <sup>6</sup> X + 4.52 <sup>6</sup> | 99.10          | > 0.0001    | 0.0001      |
| Tyr      | 0.0001 – 20      | Y = 520 669X + 411 370                      | 97.20          | > 0.0001    | 0.0001      |
| ABA      | 0.01 – 20        | Y = 1.29 <sup>6</sup> X + 103 687           | 99.50          | > 0.01      | 0.01        |
| MeSA     | 0.1 – 20         | Y = 936 107X + 41 425                       | 99.86          | > 0.1       | 0.1         |

LOD = the value corresponding to signal to noise ratio (S/N) = 3, while for LOQ is S/N = 10.

**Table S4.** Percentage of recovery of abscisic acid and methyl salicylate during phytohormone extraction from tomato plant tissue.

| Compound | % of recovery (Mean)                    |                     |                    |                                 |
|----------|-----------------------------------------|---------------------|--------------------|---------------------------------|
|          | Low (1 ng/μL for ABA)<br>(3 ng/μL MeSA) | Medium<br>(6 ng/μL) | High<br>(12 ng/μL) | Overall recovery<br>(% average) |
| ABA      | 89.21                                   | 85.89               | 76.98              | 87.03                           |
| MeSA     | 87.52                                   | 85.05               | 86.71              | 86.43                           |

**Table S5.** Post-hoc tests comparing mean values of quantified aromatic amino acids and phytohormones in PGRP-primed-unchallenged vs. PGRP-primed-challenged tomato plant tissues.

| Dependent Variable | (I) Condition | (J) Condition | N04<br><i>p</i> -value | T22<br><i>p</i> -value |
|--------------------|---------------|---------------|------------------------|------------------------|
| Roots              |               |               |                        |                        |
| Phe                | R NT Day 2    | R NT Day 8    | 0.184                  | 0.950                  |
|                    |               | R PC Day 2    | 0.000                  | 0.000                  |
|                    |               | R PC Day 4    | 0.000                  | 0.000                  |
|                    |               | R PC Day 6    | 0.000                  | 0.000                  |
|                    |               | R PC Day 8    | 0.000                  | 0.000                  |
|                    | R NT Day 8    | R NT Day 2    | 0.184                  | 0.950                  |
|                    |               | R PC Day 2    | 0.114                  | 0.000                  |
|                    |               | R PC Day 4    | 0.000                  | 0.000                  |
|                    |               | R PC Day 6    | 0.000                  | 0.000                  |
|                    |               | R PC Day 8    | 0.000                  | 0.000                  |
| Trp                | R NT Day 2    | R NT Day 8    | 1.000                  | 0.841                  |
|                    |               | R PC Day 2    | 0.000                  | 0.000                  |
|                    |               | R PC Day 4    | 0.000                  | 0.000                  |

|       |            |            |       |       |
|-------|------------|------------|-------|-------|
|       |            | R PC Day 6 | 0.000 | 0.000 |
|       |            | R PC Day 8 | 0.000 | 0.000 |
|       | R NT Day 8 | R NT Day 2 | 1.000 | 0.841 |
|       |            | R PC Day 2 | 0.000 | 0.000 |
|       |            | R PC Day 4 | 0.000 | 0.000 |
|       |            | R PC Day 6 | 0.000 | 0.000 |
|       |            | R PC Day 8 | 0.000 | 0.000 |
| Tyr   | R NT Day 2 | R NT Day 8 | 0.000 | 0.999 |
|       |            | R PC Day 2 | 0.000 | 0.000 |
|       |            | R PC Day 4 | 0.000 | 0.000 |
|       |            | R PC Day 6 | 0.000 | 0.000 |
|       |            | R PC Day 8 | 0.000 | 0.000 |
|       | R NT Day 8 | R NT Day 2 | 0.000 | 0.999 |
|       |            | R PC Day 2 | 0.000 | 0.000 |
|       |            | R PC Day 4 | 0.000 | 0.000 |
|       |            | R PC Day 6 | 0.000 | 0.000 |
|       |            | R PC Day 8 | 0.000 | 0.000 |
| ABA   | R NT Day 2 | R NT Day 8 | 0.803 | 0.996 |
|       |            | R PC Day 2 | 0.998 | 1.000 |
|       |            | R PC Day 4 | 0.742 | 0.766 |
|       |            | R PC Day 6 | 1.000 | 0.862 |
|       |            | R PC Day 8 | 1.000 | 0.001 |
|       | R NT Day 8 | R NT Day 2 | 0.803 | 0.996 |
|       |            | R PC Day 2 | 0.534 | 0.999 |
|       |            | R PC Day 4 | 0.108 | 0.961 |
|       |            | R PC Day 6 | 0.779 | 0.988 |
|       |            | R PC Day 8 | 0.729 | 0.006 |
| MeSA  | R NT Day 2 | R NT Day 8 | 0.316 | 0.000 |
|       |            | R PC Day 2 | 0.017 | 0.000 |
|       |            | R PC Day 4 | 0.071 | 0.000 |
|       |            | R PC Day 6 | 0.154 | 0.000 |
|       |            | R PC Day 8 | 1.000 | 0.000 |
|       | R NT Day 8 | R NT Day 2 | 0.316 | 0.000 |
|       |            | R PC Day 2 | 0.781 | 0.765 |
|       |            | R PC Day 4 | 0.975 | 0.470 |
|       |            | R PC Day 6 | 0.999 | 0.075 |
|       |            | R PC Day 8 | 0.193 | 0.288 |
| Stems |            |            |       |       |
| Phe   | S NT Day 2 | S NT Day 8 | 0.003 | 0.999 |
|       |            | S PC Day 2 | 1.000 | 0.000 |
|       |            | S PC Day 4 | 0.000 | 0.000 |
|       |            | S PC Day 6 | 0.000 | 0.000 |
|       |            | S PC Day 8 | 0.001 | 0.000 |
|       | S NT Day 8 | S NT Day 2 | 0.003 | 0.999 |
|       |            | S PC Day 2 | 0.004 | 0.000 |
|       |            | S PC Day 4 | 0.000 | 0.000 |
|       |            | S PC Day 6 | 0.000 | 0.000 |
|       |            | S PC Day 8 | 0.000 | 0.000 |
| Trp   | S NT Day 2 | S NT Day 8 | 0.000 | 0.994 |
|       |            | S PC Day 2 | 0.218 | 0.000 |
|       |            | S PC Day 4 | 0.000 | 0.000 |
|       |            | S PC Day 6 | 0.000 | 0.000 |
|       |            | S PC Day 8 | 0.000 | 0.000 |
|       | S NT Day 8 | S NT Day 2 | 0.000 | 0.994 |
|       |            | S PC Day 2 | 0.000 | 0.000 |
|       |            | S PC Day 4 | 0.000 | 0.000 |
|       |            | S PC Day 6 | 0.000 | 0.000 |
|       |            | S PC Day 8 | 0.000 | 0.000 |
| Tyr   | S NT Day 2 | S NT Day 8 | 0.000 | 0.956 |
|       |            | S PC Day 2 | 0.000 | 0.000 |
|       |            | S PC Day 4 | 0.088 | 0.000 |
|       |            | S PC Day 6 | 0.738 | 0.000 |
|       |            | S PC Day 8 | 0.003 | 0.000 |
|       | S NT Day 8 | S NT Day 2 | 0.000 | 0.956 |

|             |            |               |            |            |       |       |
|-------------|------------|---------------|------------|------------|-------|-------|
|             |            | S PC Day 2    | 0.000      | 0.000      |       |       |
|             |            | S PC Day 4    | 0.000      | 0.000      |       |       |
|             |            | S PC Day 6    | 0.000      | 0.000      |       |       |
|             |            | S PC Day 8    | 0.000      | 0.000      |       |       |
| ABA         | S NT Day 2 | S NT Day 8    | 0.731      | 0.000      |       |       |
|             |            | S PC Day 2    | 0.157      | 0.002      |       |       |
|             |            | S PC Day 4    | 0.125      | 0.028      |       |       |
|             |            | S PC Day 6    | 0.000      | 0.983      |       |       |
|             |            | S PC Day 8    | 0.000      | 1.000      |       |       |
|             |            | S NT Day 8    | S NT Day 2 | 0.731      | 0.000 |       |
|             | S PC Day 2 |               | 0.892      | 0.991      |       |       |
|             | S PC Day 4 |               | 0.846      | 0.682      |       |       |
|             | S PC Day 6 |               | 0.000      | 0.003      |       |       |
|             | MeSA       | S NT Day 2    | S PC Day 8 | 0.000      | 0.000 |       |
| S NT Day 8  |            |               | 1.000      | 0.173      |       |       |
| S PC Day 2  |            |               | 0.151      | 0.202      |       |       |
| S4 PC Day 4 |            |               | 0.002      | 0.000      |       |       |
| S PC Day 6  |            |               | 0.199      | 0.000      |       |       |
| S NT Day 8  |            | S PC Day 8    | 0.013      | 0.000      |       |       |
|             |            | S NT Day 2    | 1.000      | 0.173      |       |       |
|             |            | S PC Day 2    | 0.272      | 0.000      |       |       |
|             |            | S PC Day 4    | 0.004      | 0.019      |       |       |
|             |            | S PC Day 6    | 0.343      | 0.007      |       |       |
|             |            | S PC Day 8    | 0.030      | 0.215      |       |       |
|             |            | Leaves        |            |            |       |       |
|             |            | Phe           | L NT Day 2 | L NT Day 8 | 0.000 | 0.927 |
|             |            |               |            | L PC Day 2 | 0.000 | 0.000 |
|             |            |               |            | L PC Day 4 | 0.000 | 0.000 |
|             |            |               |            | L PC Day 6 | 0.000 | 0.000 |
|             |            |               |            | L PC Day 8 | 1.000 | 0.000 |
|             |            |               | L NT Day 8 | L NT Day 2 | 0.000 | 0.927 |
|             |            |               |            | L PC Day 2 | 0.000 | 0.000 |
|             |            |               |            | L PC Day 4 | 0.000 | 0.000 |
| L PC Day 6  | 0.000      |               |            | 0.000      |       |       |
| L PC Day 8  | 0.000      |               |            | 0.000      |       |       |
| Trp         | L NT Day 2 | L NT Day 8    | 0.000      | 0.000      |       |       |
|             |            | L PC Day 2    | 0.004      | 0.000      |       |       |
|             |            | L PC Day 4    | 0.000      | 0.000      |       |       |
|             |            | L PC Day 6    | 0.000      | 0.000      |       |       |
|             |            | L PC Day 8    | 0.002      | 0.000      |       |       |
|             | L NT Day 8 | L NT Day 2    | 0.000      | 0.000      |       |       |
|             |            | L PC Day 2    | 0.130      | 0.000      |       |       |
|             |            | L PC Day 4    | 0.000      | 0.000      |       |       |
|             |            | L PC Day 6    | 0.000      | 0.000      |       |       |
|             |            | L PC Day 8    | 0.132      | 0.000      |       |       |
| Tyr         | L NT Day 2 | L NT Day 8    | 0.000      | 0.988      |       |       |
|             |            | L PC Day 2    | 0.000      | 0.000      |       |       |
|             |            | L PC Day 4    | 0.000      | 0.000      |       |       |
|             |            | L PC Day 6    | 0.240      | 0.000      |       |       |
|             |            | L PC Day 8    | 0.000      | 0.000      |       |       |
|             | L NT Day 8 | L NT Day 2    | 0.000      | 0.988      |       |       |
|             |            | L PC Day 2    | 0.000      | 0.000      |       |       |
|             |            | L PC Day 4    | 0.000      | 0.000      |       |       |
|             |            | L PC Day 6    | 0.000      | 0.000      |       |       |
|             |            | L PC Day 8    | 0.764      | 0.000      |       |       |
| ABA         | L NT Day 2 | L NT Day 8    | 0.641      | 0.961      |       |       |
|             |            | L PC Day 2    | 1.000      | 0.947      |       |       |
|             |            | L PC Day 4    | 0.277      | 0.001      |       |       |
|             |            | L PC Day 6    | 0.104      | 0.333      |       |       |
|             |            | L PC Day 8    | 0.472      | 0.999      |       |       |
|             | L NT Day 8 | L NT Day 2    | 0.641      | 0.961      |       |       |
|             |            | L PC Day 2    | 0.774      | 1.000      |       |       |
|             |            | L PC Day 4    | 0.007      | 0.009      |       |       |
|             |            | LN04 PC Day 6 | 0.002      | 0.826      |       |       |

|      |            |               |       |       |
|------|------------|---------------|-------|-------|
| MeSA | L NT Day 2 | LN04 PC Day 8 | 0.021 | 0.998 |
|      |            | LN04 NT Day 8 | 0.999 | 0.000 |
|      |            | LN04 PC Day 2 | 0.423 | 0.000 |
|      |            | LN04 PC Day 4 | 0.001 | 0.000 |
|      |            | LN04 PC Day 6 | 0.000 | 0.000 |
|      | L NT Day 8 | LN04 PC Day 8 | 0.000 | 0.000 |
|      |            | LN04 NT Day 2 | 0.999 | 0.000 |
|      |            | LN04 PC Day 2 | 0.252 | 0.468 |
|      |            | LN04 PC Day 4 | 0.000 | 0.056 |
|      |            | LN04 PC Day 6 | 0.000 | 0.096 |
|      |            | LN04 PC Day 8 | 0.000 | 0.286 |

**Table S6. Summary of annotated (MSI-level 2) metabolites that contributed to the discriminating variability in the altered metabolomes (as described by chemometric models).** These discriminating metabolites were identified based on OPLS-DA S-plots, with a rigorous statistical validation (as explained in the text – Figure 6). These reported metabolites had VIP scores > 1.0.

| No. | Rt (min) | Ionization mode    | m/z      | Compound Name                 | Abbreviation         | MS fragments (m/z)          |
|-----|----------|--------------------|----------|-------------------------------|----------------------|-----------------------------|
| 1   | 1.53     | [M-H] <sup>-</sup> | 191.018  | Citric acid I                 | C-acid I             | 173, 115, 111               |
| 2   | 1.53     | [M-H] <sup>-</sup> | 341.106  | Caffeoylglycoside             | CGA                  | 179                         |
| 3   | 1.61     | [M+H] <sup>+</sup> | 116.064  | Proline                       | Pro                  | 70                          |
| 4   | 1.62     | [M-H] <sup>-</sup> | 191.051  | Quinic acid                   | Q-acid               | 173                         |
| 5   | 1.75     | [M-H] <sup>-</sup> | 133.009  | Malic acid                    | M-acid               | 114, 89, 72                 |
| 6   | 1.98     | [M-H] <sup>-</sup> | 371.06   | Caffeoylgucarate I            | CGA                  | 209, 191, 85                |
| 7   | 1.99     | [M-H] <sup>-</sup> | 191.013  | Citric acid II                | C-acid II            | 173, 115, 111               |
| 8   | 2.12     | [M-H] <sup>-</sup> | 191.014  | 3-Caffeoylquinic acid         | 3-CQA                | 191, 179, 135               |
| 9   | 2.12     | [M+H] <sup>+</sup> | 182.075  | Tyrosine                      | Tyr                  | 91                          |
| 10  | 2.28     | [M-H] <sup>-</sup> | 371.059  | Caffeoylgucarate II           | CGA                  | 209, 191, 85                |
| 11  | 2.74     | [M-H] <sup>-</sup> | 371.057  | Caffeoylgucarate III          | CGA                  | 209, 191, 85                |
| 12  | 3        | [M-H] <sup>-</sup> | 203.076  | Tryptophan                    | Trp                  | 142, 116                    |
| 13  | 3.01     | [M-H] <sup>-</sup> | 371.058  | Caffeoylgucarate IV           | CGA                  | 209, 191, 85                |
| 14  | 3.03     | [M-H] <sup>-</sup> | 369.042  | Sinapaldehyde glycoside       | S-al glyc            | 147                         |
| 15  | 3.38     | [M+H] <sup>+</sup> | 166.079  | Phenylalanine                 | Phe                  | 120, 103, 91, 77            |
| 16  | 3.58     | [M-H] <sup>-</sup> | 369.042  | Sinapaldehyde glucoside       | S-al glyc            | 147                         |
| 17  | 3.61     | [M+H] <sup>+</sup> | 251.134  | Caffeoylputrescine            | C-putr               | 234, 163, 145, 135, 117, 89 |
| 18  | 4.01     | [M-H] <sup>-</sup> | 353.082  | 4-CQA                         | 3-CQA                | 191, 179, 173, 135          |
| 19  | 4.05     | [M-H] <sup>-</sup> | 369.042  | Sinapaldehyde glucoside       | S-al glyc            | 147                         |
| 20  | 4.19     | [M-H] <sup>-</sup> | 353.084  | 5-Caffeoylquinic acid         | 5-CQA                | 191                         |
| 22  | 4.58     | [M-H] <sup>-</sup> | 285.057  | Dihydroxybenzoic acid pentose | diHydro-Be acid pent | 153                         |
| 24  | 5.57     | [M-H] <sup>-</sup> | 367.0245 | 3-Feruloylquinic acid         | 3-FQA                | 191                         |
| 25  | 5.64     | [M-H]              | 707.183  | 5-CQA                         | 5-CQA                | 191                         |
| 26  | 6.1      | [M-H]              | 367.099  | 5-Feruloylquinic acid         | 5-FQA                | 191                         |
| 27  | 6.46     | [M-H]              | 385      | Sinapoylglycoside             | S-glyc               | 205                         |
| 28  | 6.47     | [M-H]              | 355.101  | Feruloylglycoside             | F-glyc               | 193                         |
| 29  | 6.56     | [M-H]              | 385.111  | Sinapoylglycoside             | S-glyc               | 203                         |
| 30  | 6.62     | [M-H]              | 385.107  | Sinapoylglycoside             | S-glyc               | 203                         |
| 31  | 6.72     | [M-H]              | 355.099  | Feruloylglycoside             | F-glyc               | 193                         |
| 32  | 6.77     | [M-H]              | 335.169  | Caffeoylshikimic acid         | CSA                  | 179, 135                    |
| 34  | 6.88     | [M-H]              | 441.196  | Benzyl alcohol dihexose       | Ben-alc di-hex       | 269, 223, 161, 113, 101     |
| 35  | 7.63     | [M-H]              | 411.184  | Caffeoylputrescine glycoside  | C-putr glyc          | 321, 249, 135               |
| 36  | 7.66     | [M-H]              | 367.092  | 5-Feruloylquinic acid         | 5-FQA                | 191                         |
| 37  | 7.72     | [M-H]              | 609.146  | Rutin                         | Rutin                | 300                         |
| 38  | 8.36     | [M-H]              | 741.195  | Quercetin-3-O-trisacharide    | Qu-3-O-tri-sach      | 300                         |
| 39  | 8.95     | [M+H] <sup>+</sup> | 412.212  | Tomatid-4-en-3-one            | Tomat-one            | 325, 271, 161               |
| 42  | 9.58     | [M-H]              | 245.087  | Acetyl tryptophan             | Acetyl trp           | 203                         |



|    |       |                    |          |                                      |                                                |                         |
|----|-------|--------------------|----------|--------------------------------------|------------------------------------------------|-------------------------|
| 43 | 9.66  | [M-H]              | 474.176  | Feruloyltyramine glyco-side          | F-tyr glyc                                     | 312, 178                |
| 44 | 11.02 | [M+H] <sup>+</sup> | 1050.28  | Neorickioside A                      | Neo A                                          | 1032, 414, 273, 255,    |
| 45 | 11.21 | [M+H] <sup>+</sup> | 1050.213 | Lycoperside H                        | Lyc H                                          | 1032, 576, 272, 255     |
| 46 | 11.24 | [M+H] <sup>+</sup> | 1032.56  | Dehydrotomatine                      | De-tom I                                       | 576, 558, 414           |
| 47 | 11.64 | [M+H] <sup>+</sup> | 1032.56  | Dehydrotomatine                      | De-tom II                                      | 576, 558, 414           |
| 48 | 11.89 | [M+H] <sup>+</sup> | 1032.56  | Dehydrotomatine                      | De-tom III                                     | 576, 558, 414           |
| 49 | 12.23 | [M+H] <sup>+</sup> | 1032.56  | Dehydrotomatine                      | De-tom IV                                      | 576, 558, 414           |
| 50 | 12.57 | [M+H] <sup>+</sup> | 1034.57  | $\alpha$ -Tomatine I                 | $\alpha$ -Tom I                                | 578, 560, 416, 255, 161 |
| 51 | 12.62 | [M+H] <sup>+</sup> | 1032.56  | Dehydrotomatine                      | De-tom                                         | 576, 558, 414           |
| 52 | 12.87 | [M+H] <sup>+</sup> | 1034.57  | $\alpha$ -Tomatine                   | $\alpha$ -Tom II                               | 578, 560, 416, 255, 161 |
| 53 | 12.91 | [M+H] <sup>+</sup> | 1032.56  | Dehydrotomatine                      | De-tom                                         | 576, 558, 414           |
| 54 | 13.27 | [M+H] <sup>+</sup> | 295.096  | $\alpha$ -Tomatine                   | $\alpha$ -Tom III                              | 578, 416                |
| 55 | 13.33 | [M+H] <sup>+</sup> | 1034.25  | $\alpha$ -Tomatine                   | $\alpha$ -Tom IV                               | 578, 416                |
| 56 | 13.35 | [M+H] <sup>+</sup> | 1004.56  | Tomatidine dihexoside dipentoside    | Tomati dihex dipent                            | 569                     |
| 57 | 13.55 | [M+H] <sup>+</sup> | 1034.57  | $\alpha$ -Tomatine                   | $\alpha$ -Tom V                                | 578, 560, 416, 255, 161 |
| 58 | 14.04 | [M+H] <sup>+</sup> | 1240.64  | $\alpha$ -Tomatine                   | $\alpha$ -Tom VI                               | 578, 560, 416, 255, 161 |
| 59 | 14.36 | [M+H] <sup>+</sup> | 414.331  | Tomatodenol +232                     | Tomato conj                                    | 273, 255, 161           |
| 60 | 14.38 | [M-H] <sup>-</sup> | 447.221  | Kaempferol-3-glucoside               | Ka-3-gluc                                      | 285                     |
| 61 | 15.15 | [M+H] <sup>+</sup> | 414.332  | Tomatodenol + 248                    | Tomato conj                                    | 273, 255, 161           |
| 62 | 15.76 | [M-H] <sup>-</sup> | 327.213  | Trihydroxy-octadecadi-enoic acid I   | C <sub>18</sub> H <sub>32</sub> O <sub>5</sub> | 171                     |
| 63 | 15.96 | [M+H] <sup>+</sup> | 412.315  | Tomatid-4-en-3-one                   | Tomat-one                                      | 351, 325, 271           |
| 64 | 16.06 | [M-H] <sup>-</sup> | 327.213  | Trihydroxy-octadecadi-enoic acid II  | C <sub>18</sub> H <sub>32</sub> O <sub>5</sub> | 171                     |
| 65 | 16.41 | [M+H] <sup>+</sup> | 414.33   | Tomatodenol                          | Tomato I                                       | 273, 255, 161           |
| 66 | 16.77 | [M-H] <sup>-</sup> | 329.229  | Trihydroxy-octadecenoic acid I       | C <sub>18</sub> H <sub>34</sub> O <sub>5</sub> | 271, 171, 139           |
| 67 | 16.8  | [M-H] <sup>-</sup> | 327.212  | Trihydroxy-octadecadi-enoic acid III | C <sub>18</sub> H <sub>32</sub> O <sub>5</sub> | 171                     |
| 68 | 16.96 | [M+H] <sup>+</sup> | 416.348  | Tomatidine                           | Tomati I                                       | 273, 255, 163           |
| 69 | 17.05 | [M-H] <sup>-</sup> | 329.228  | Trihydroxy-octadecenoic acid II      | C <sub>18</sub> H <sub>34</sub> O <sub>5</sub> | 171, 139                |
| 70 | 17.06 | [M+H] <sup>+</sup> | 414.333  | Tomatodenol                          | Tomato II                                      | 273, 255, 161           |
| 71 | 17.83 | [M+H] <sup>+</sup> | 414.332  | Tomatodenol                          | Tomato III                                     | 273, 255, 161           |
| 72 | 17.85 | [M+H] <sup>+</sup> | 416.349  | Tomatidine                           | Tomati II                                      | 273, 255, 163           |
| 73 | 18.75 | [M+H] <sup>+</sup> | 414.333  | Tomatodenol                          | Tomato IV                                      | 273, 255, 161           |
| 75 | 19.87 | [M-H] <sup>-</sup> | 593.281  | Kaempferol-O-B-rutino-side           | Ka-3-O-B-rut                                   | 285                     |
| 78 | 21.73 | [M-H] <sup>-</sup> | 593.275  | Kaempferol-O-B-rutino-side           | Ka-3-O-B-rut                                   | 285                     |
| 79 | 22.65 | [M-H] <sup>-</sup> | 474.26   | Feruloytyramine glyco-side           | F-tyr glyc                                     | 312, 178                |

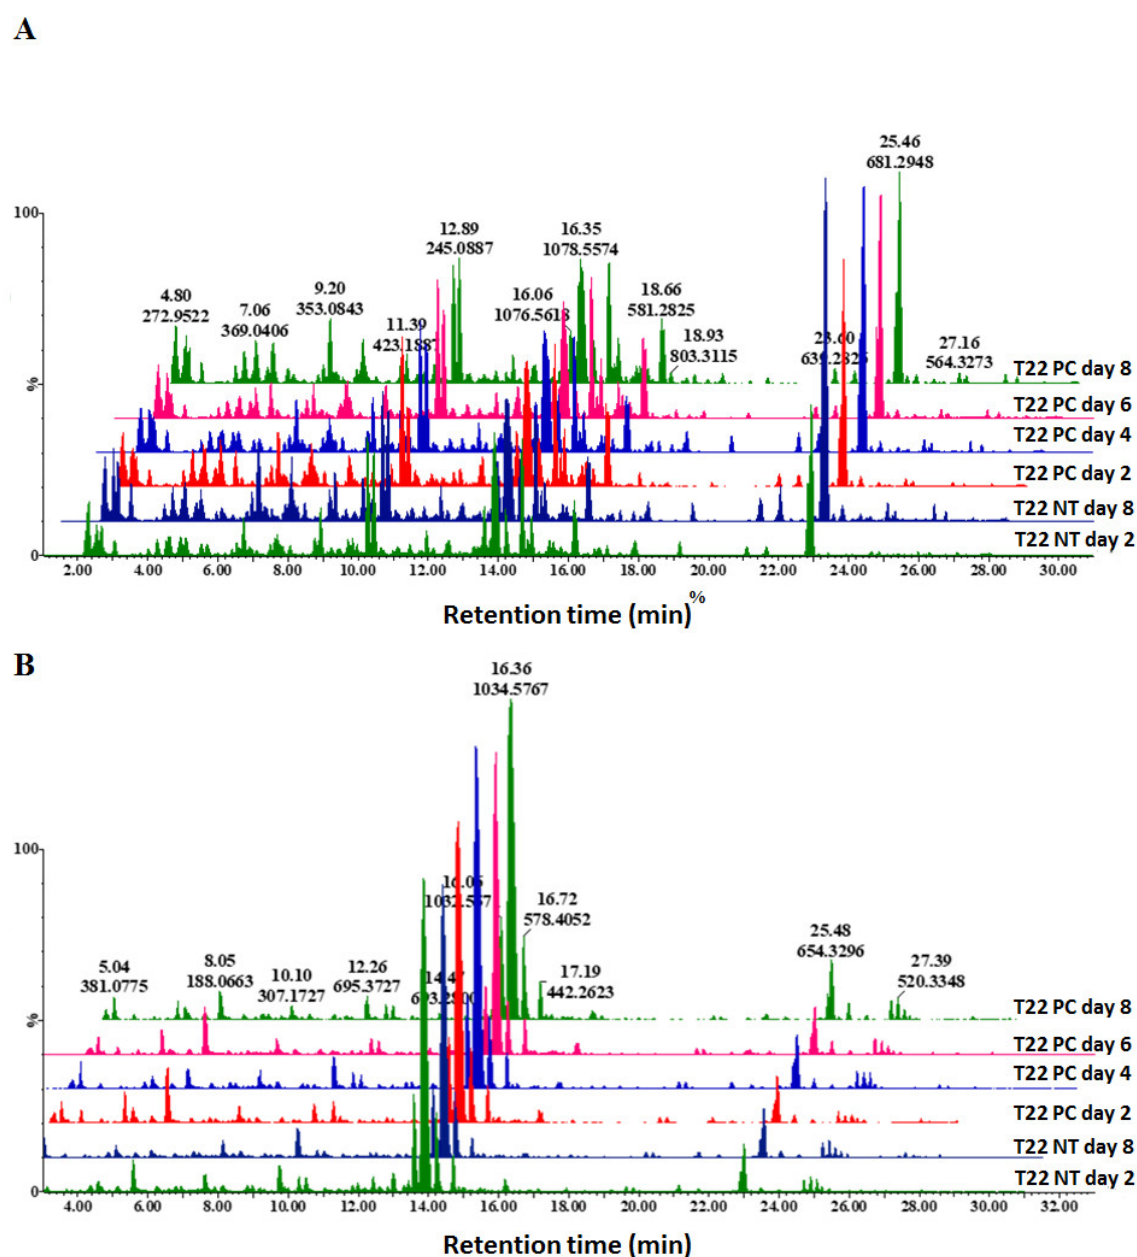

**Figure S1.** Representative BPI MS chromatograms of extracts from leaf tissue from primed-unchallenged (*Paenibacillus alvei* T22 NT), and primed-challenged (*Paenibacillus alvei* T22 PC) tomato plants. Base peak mass chromatograms displaying comparative chromatographic differences at different time points: primed-unchallenged (T22 NT, days 2 and 8) and primed-challenged (T22 PC, days 2, 4, 6 and 8) infected. Visual inspection of the chromatograms evidently shows differential peak populations, for instance in the **4–20 min** chromatographic region. **(A):** ESI negative mode and **(B):** ESI positive mode.

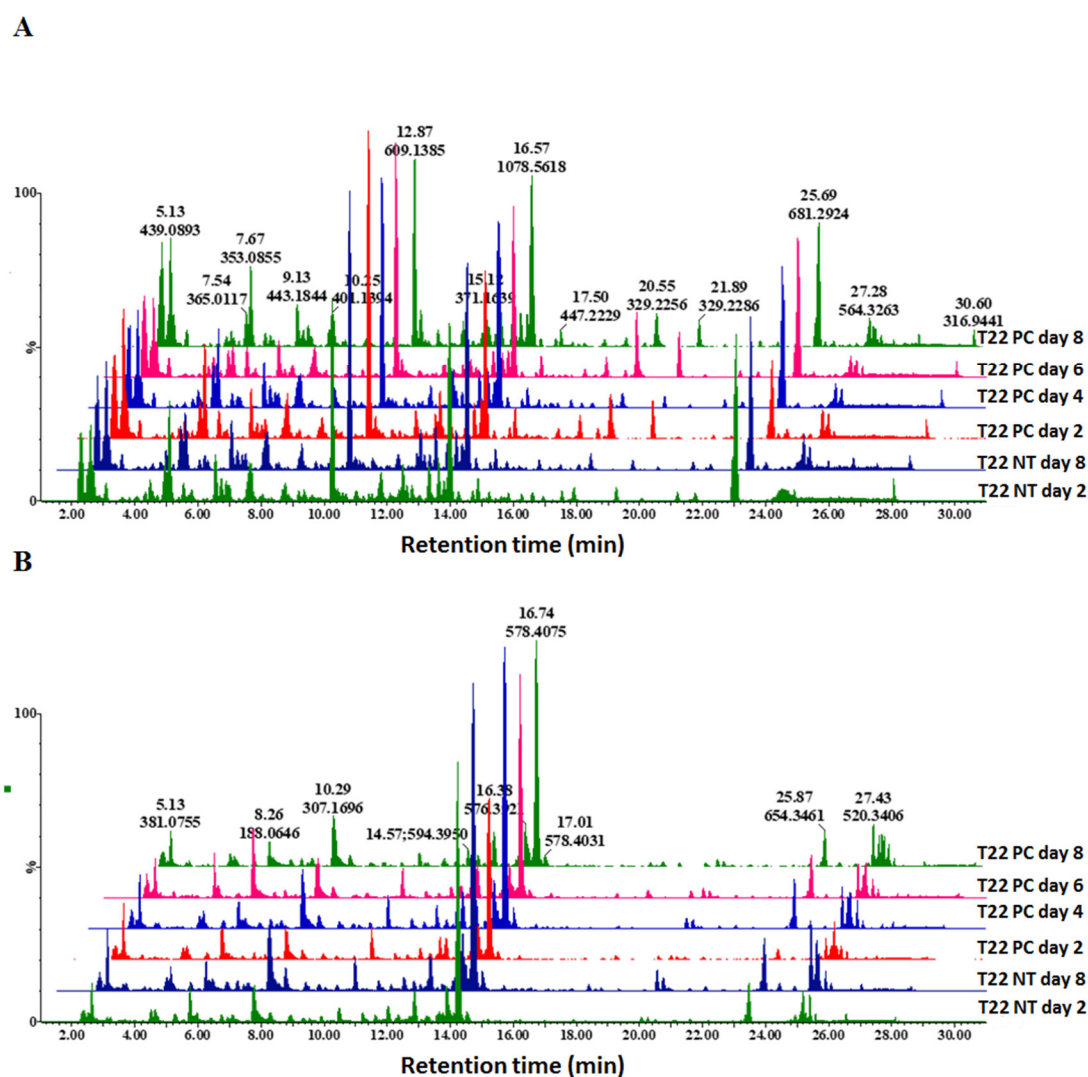

**Figure S2.** Representative BPI MS chromatograms of extracts from **stem** tissue from primed-unchallenged (*Paenibacillus alvei* T22 NT) and primed-challenged (*Paenibacillus alvei* T22 PC) tomato plants. Base peak mass chromatograms displaying comparative chromatographic differences at different time points: primed-unchallenged (T22 NT, days 2 and 8) and primed-challenged (T22 PC, days 2, 4, 6 and 8) infected. Visual inspection of the chromatograms evidently shows differential peak populations, for instance in the 4–20 min chromatographic region. **(A):** ESI negative mode and **(B):** ESI positive mode.

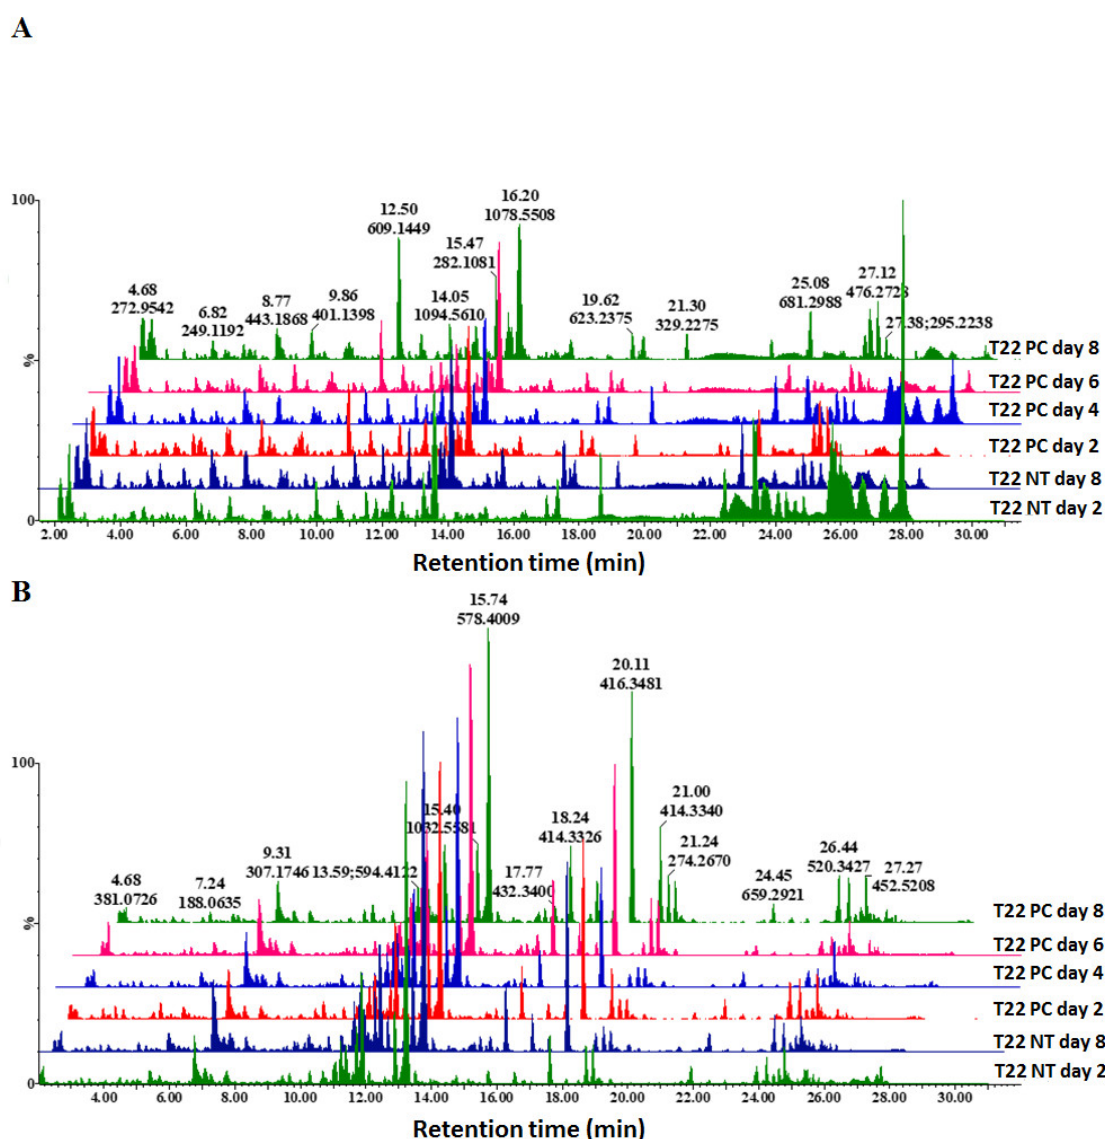

**Figure S3.** Representative BPI MS chromatograms of extracts from root tissue from primed-unchallenged (*Paenibacillus alvei* T22 NT) and primed-challenged (*Paenibacillus alvei* T22 PC) tomato plants. Base peak mass chromatograms displaying comparative chromatographic differences at different time points: primed-unchallenged (T22 NT, days 2 and 8) and primed-challenged (T22 PC, days 2, 4, 6 and 8) infected. Visual inspection of the chromatograms evidently shows differential peak populations, for instance in the 4–20 min chromatographic region. **(A):** ESI negative mode and **(B):** ESI positive mode.

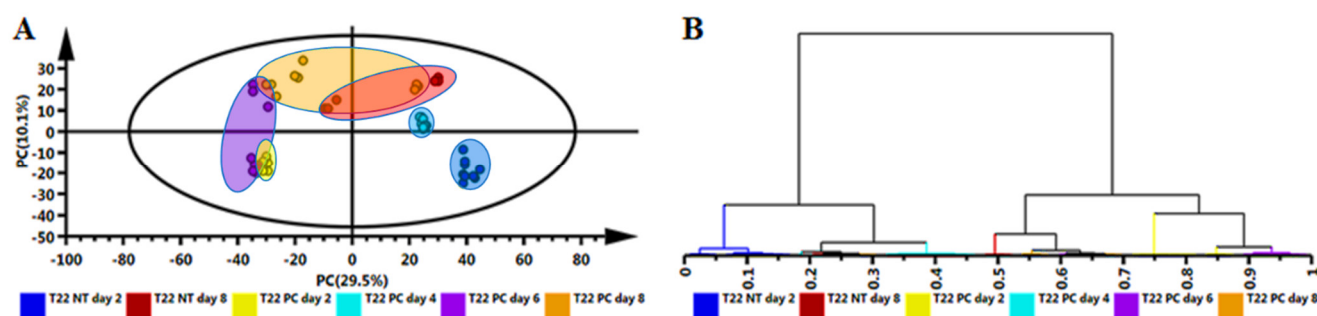

**Figure S4.** Unsupervised statistical analysis of tomato **leaf** data acquired in ESI<sup>+</sup> mode comparing *Pa. alvei* T22-primed and primed-challenged plants. **(A):** A PCA scores scatter plot of all the samples, including the QC samples, coloured according to time points. The PCA model presented here was a 5-component model, with  $R^2$  of 0.54 and  $Q^2$  of 0.41. **(B):** The HiCA dendrogram corresponding to **(A)**. Unsupervised statistical analysis is used to generate subgrouping of samples based on similar observations in **(A)** while the HCA dendrogram shows the hierarchical relationship between samples **(B)**.

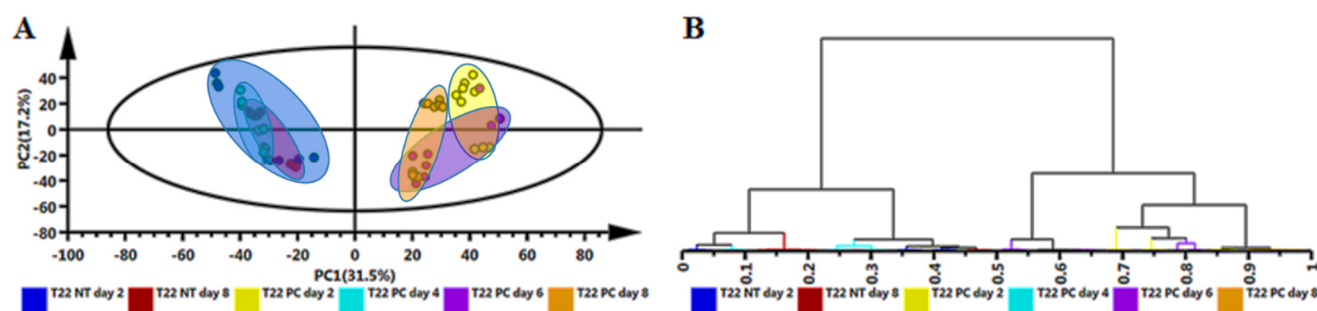

**Figure S5.** Unsupervised statistical analysis of tomato **stem** data acquired in ESI<sup>+</sup> mode comparing *Pa. alvei* T22-primed and primed-challenged plants. **(A):** A PCA scores scatter plot of all the samples, including the QC samples, coloured according to time points. The PCA model presented here was a 6-component model, with  $R^2$  of 0.69 and  $Q^2$  of 0.55. **(B):** The HCA dendrogram corresponding to **(A)**. Unsupervised statistical analysis is used to generate subgrouping of samples based on similar observations in **(A)** while the HCA dendrogram shows the hierarchical relationship between samples **(B)**.

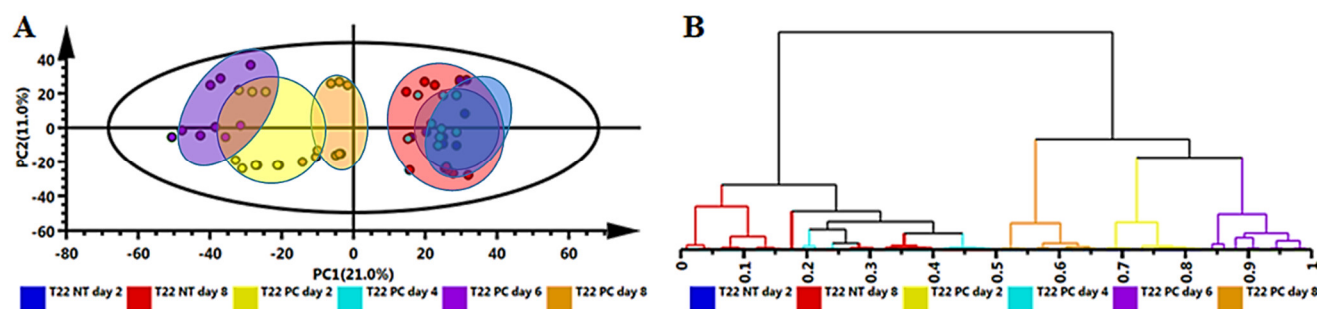

**Figure S6.** Unsupervised statistical analysis of tomato **stem** data acquired in ESI<sup>+</sup> mode comparing *Pa. alvei* T22-primed and primed-challenged plants. **(A):** A PCA scores scatter plot of all the samples, including the QC samples, coloured according to time points. The PCA model presented here was a 8-component model, with  $R^2$  of 0.68 and  $Q^2$  of 0.46. **(B):** The HCA dendrogram

corresponding to (A). Unsupervised statistical analysis is used to generate subgrouping of samples based on similar observations in (A) while the HCA dendrogram shows the hierarchical relationship between samples (B).

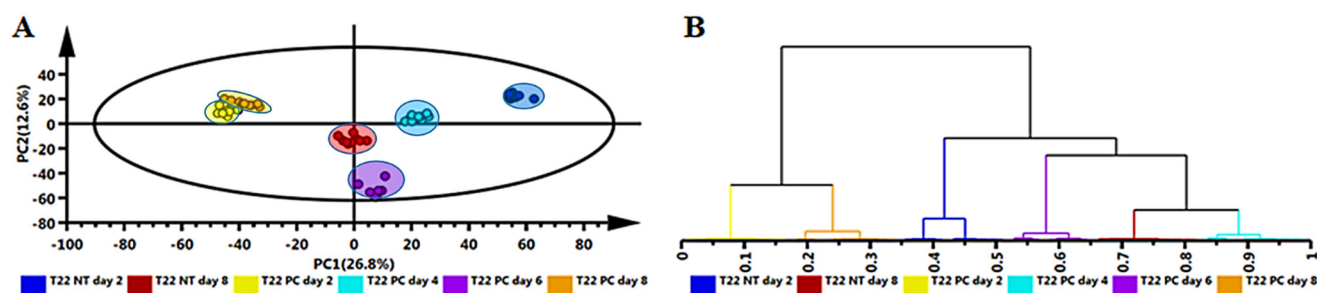

**Figure S7.** Unsupervised statistical analysis of tomato root data acquired in ESI<sup>-</sup> mode comparing *Pa. alvei* T22-primed and primed-challenged plants. (A): A PCA scores scatter plot of all the samples, including the QC samples, coloured according to time points. The PCA model presented here was a 5-component model, with  $R^2$  of 0.61 and  $Q^2$  of 0.47. (B): The HCA dendrogram corresponding to (A). Unsupervised statistical analysis is used to generate subgrouping of samples based on similar observations in (A) while the HCA dendrogram shows the hierarchical relationship between samples (B).

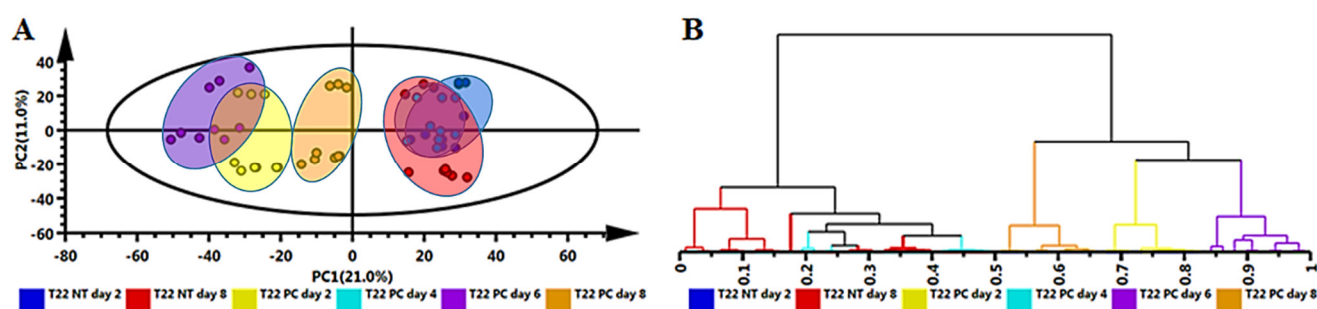

**Figure S8.** Unsupervised statistical analysis of tomato root data acquired in ESI<sup>+</sup> mode comparing *Pa. alvei* T22-primed and primed-challenged plants. (A): A PCA scores scatter plot of all the samples, including the QC samples, coloured according to time points. The PCA model presented here was a 5-component model, with  $R^2$  of 0.78 and  $Q^2$  of 0.61. (B): The HCA dendrogram corresponding to (A). Unsupervised statistical analysis is used to generate subgrouping of samples based on similar observations in (A) while the HCA dendrogram shows the hierarchical relationship between samples (B).



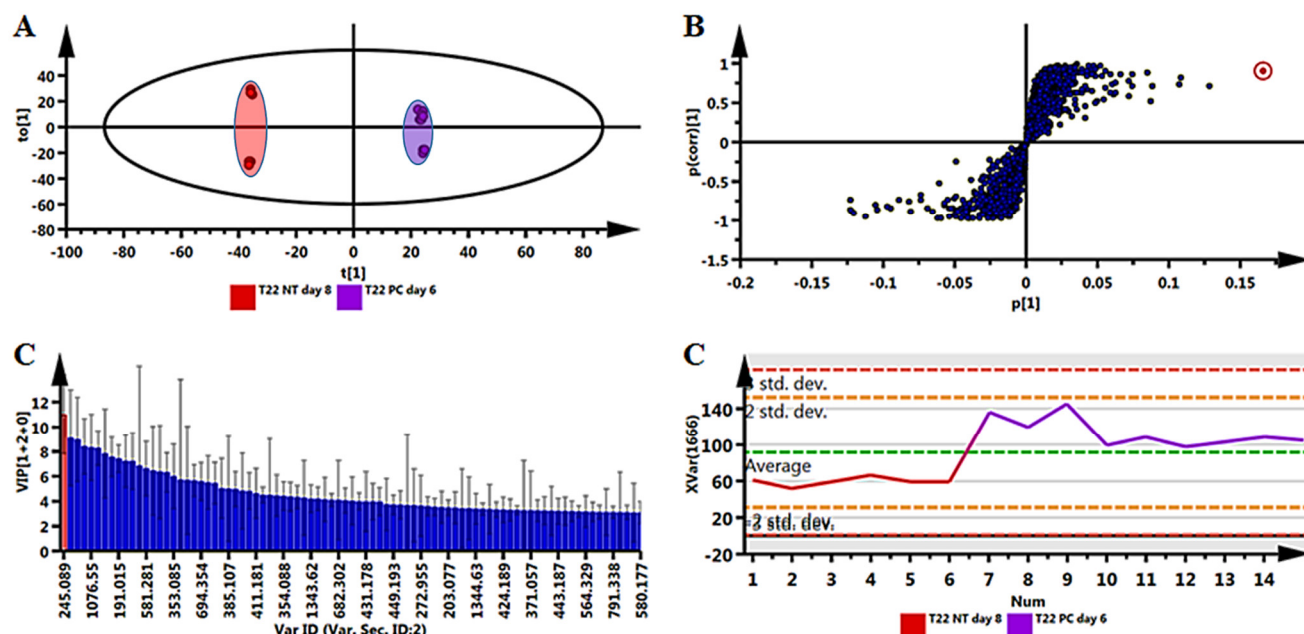

**Figure S9.** OPLS-DA modeling and variable/feature selection of leaf data acquired in ESI<sup>+</sup> mode comparing primed (*Paenibacillus alvei* T22 NT) and primed-challenged (*Paenibacillus alvei* T22 PC) plants. (A) A typical OPLS-DA score separating primed (T22 NT day 8) plants vs. primed-challenged (T22 PC day 6) plants (1 +2 + 0 components,  $R^2X = 0.511$ ,  $Q^2 = 0.946$ , CV-ANOVA  $p$ -value =  $1.4 \times 10^{-8}$ ). (B) An OPLS-DA loadings S-plot for the same model in (A); only variables with a correlation  $[p(corr)]$  of  $\geq 0.5$  and covariance of  $(p1) \geq 0.5$  were chosen as discriminating variables and identified using the  $m/z$  to generate an elemental composition. (C) Variable importance for the projection (VIP) plot for the same model, pointing mathematically to the importance of each variable in contributing to group separation in the OPLS-DA model. (D) A typical variable trend plot (of the selected variable in VIP and S-plots), displaying the changes of the selected variables across the samples (NT day 8 vs. PC day 6). This shows that the selected features significantly discriminate the primed-challenged from primed-unchallenged samples.

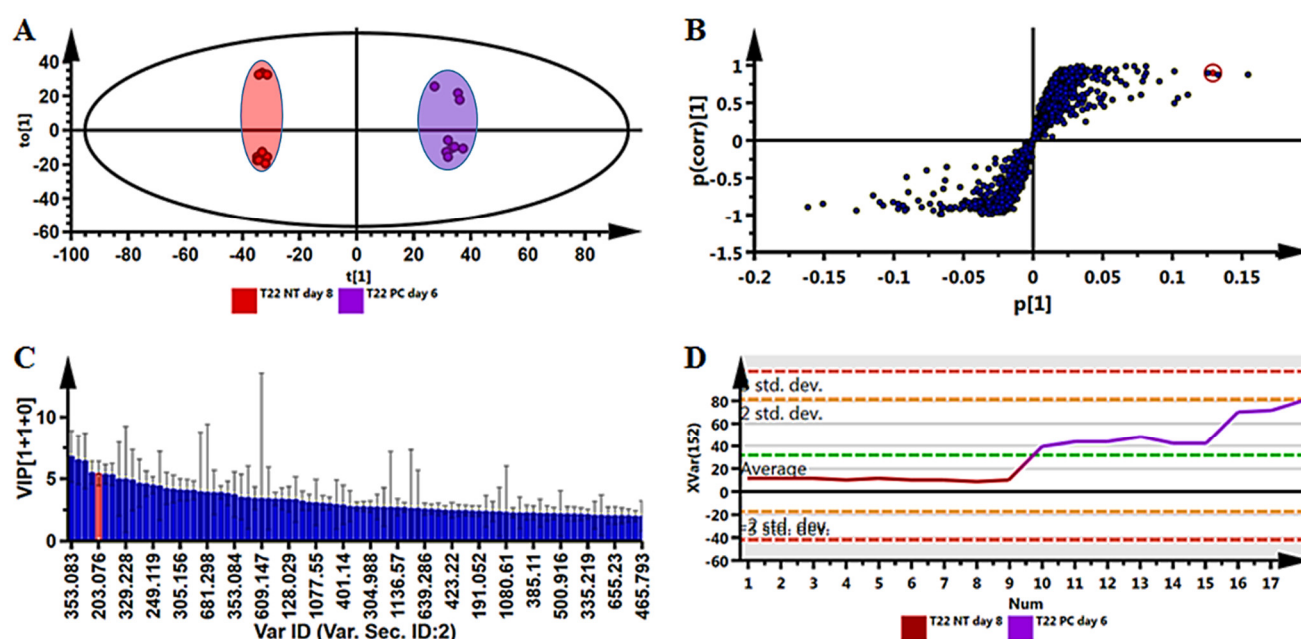

**Figure S10. OPLS-DA modeling and variable/feature selection of stem data acquired in ESI<sup>+</sup> mode comparing primed (*Paenibacillus alvei* T22 NT) and primed-challenged (*Paenibacillus alvei* T22 PC) plants. (A) A typical OPLS-DA score separating primed (T22 NT day 8) plants vs. primed-challenged (T22 PC day 6) plants (1 + 1 + 0 components,  $R^2X = 0.462$ ,  $Q^2 = 0.981$ , CV-ANOVA  $p$ -value =  $5.9 \times 10^{-11}$ ). (B) An OPLS-DA loadings S-plot for the same model in (A); only variables with a correlation  $[p(corr)]$  of  $\geq 0.5$  and covariance of  $(p1) \geq 0.5$  were chosen as discriminating variables and identified using the  $m/z$  to generate an elemental composition. (C) Variable importance for the projection (VIP) plot for the same model, pointing mathematically to the importance of each variable in contributing to group separation in the OPLS-DA model. (D) A typical variable trend plot (of the selected variable in VIP and S-plots), displaying the changes of the selected variables across the samples (NT day 8 vs. PC day 6). This shows that the selected features significantly discriminate the primed-challenged from primed-unchallenged samples.**



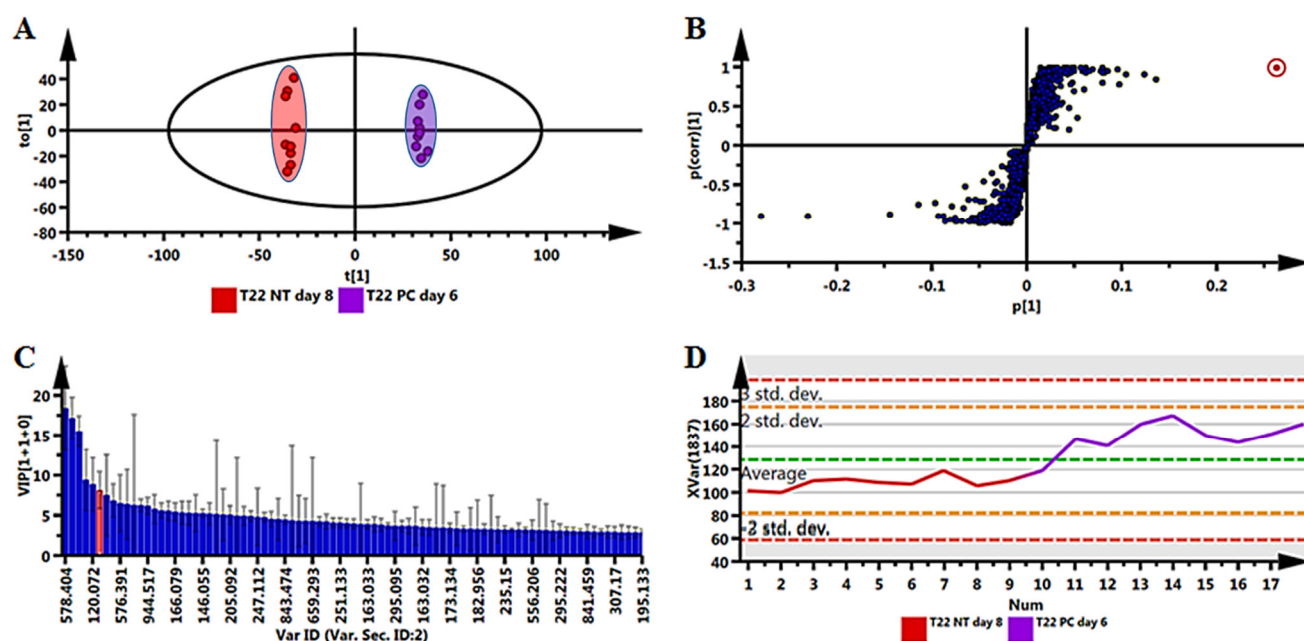

**Figure S11. OPLS-DA modeling and variable/feature selection of stem data acquired in ESI<sup>+</sup> mode comparing primed (*Paenibacillus alvei* T22 NT) and primed-challenged (*Paenibacillus alvei* T22 PC) plants. (A) A typical OPLS-DA score separating primed (T22 NT day 8) plants vs. primed-challenged (T22 PC day 6) plants (1 + 1 + 0 components,  $R^2X = 0.488$ ,  $Q^2 = 0.984$ , CV-ANOVA  $p$ -value =  $1.5 \times 10^{-11}$ ). (B) An OPLS-DA loadings S-plot for the same model in (A); only variables with a correlation [ $p(corr)$ ]  $\geq |0.6|$  and covariance ( $pI$ )  $\geq |0.5|$  were chosen as discriminating variables and identified using the  $m/z$  to generate an elemental composition. (C) Variable importance for the projection (VIP) plot for the same model, pointing mathematically to the importance of each variable in contributing to group separation in the OPLS-DA model. (D) A typical variable trend plot (of the selected variable in VIP and S-plots), displaying the changes of the selected variables across the samples (NT day 8 vs. PC day 6). This shows that the selected features significantly discriminate the primed-challenged from primed-unchallenged samples.**

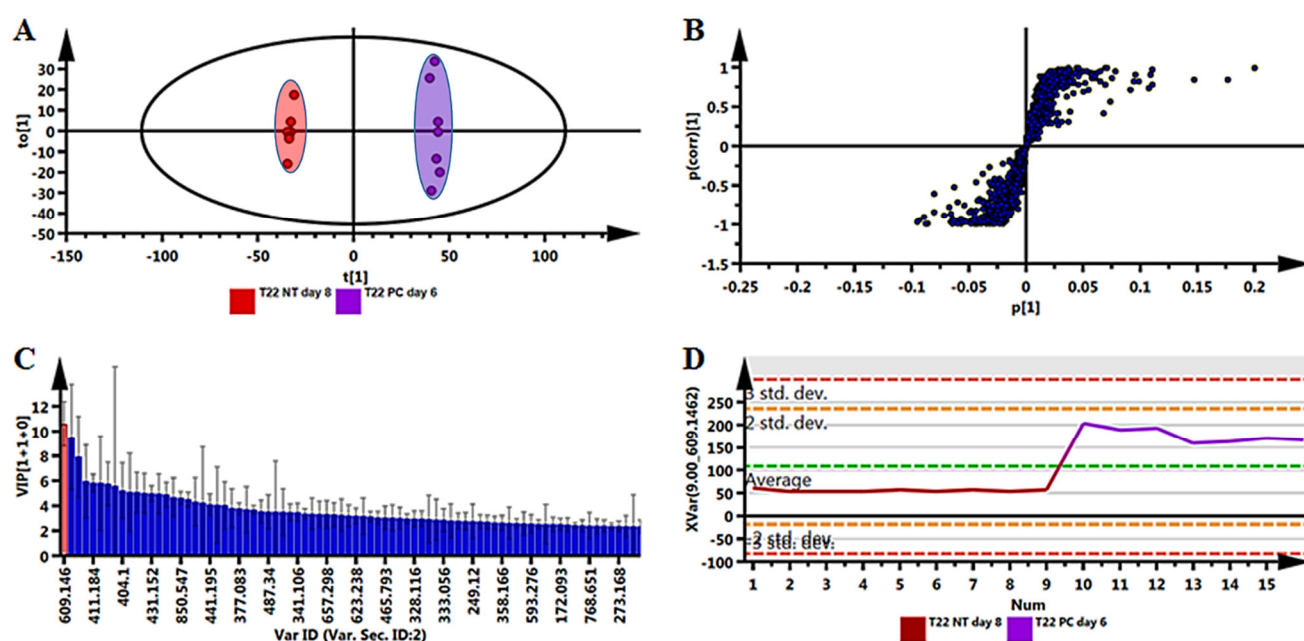

**Figure S12. OPLS-DA modeling and variable/feature selection of root data acquired in ESI<sup>+</sup> mode comparing primed (*Paenibacillus alvei* T22 NT) and primed-challenged (*Paenibacillus alvei* T22 PC) plants. (A) A typical OPLS-DA score separating primed (T22 NT day 8) plants vs. primed-challenged (T22 PC day 6) plants (1 + 1 + 0 components,  $R^2X = 0.47$ ,  $Q^2 = 0.976$ , CV-ANOVA  $p$ -value =  $8.1 \times 10^{-9}$ ). (B) An OPLS-DA loadings S-plot for the same model in (A); only variables with a correlation  $[(p(\text{corr}))] \geq |0.6|$  and covariance  $(p[1]) \geq |0.5|$  were chosen as discriminating variables and identified using the  $m/z$  to generate an elemental composition. (C) Variable importance for the projection (VIP) plot for the same model, pointing mathematically to the importance of each variable in contributing to group separation in the OPLS-DA model. (D) A typical variable trend plot (of the selected variable in VIP and S-plots), displaying the changes of the selected variables across the samples (NT day 8 vs. PC day 6). This shows that the selected features significantly discriminate the primed-challenged from primed-unchallenged samples.**

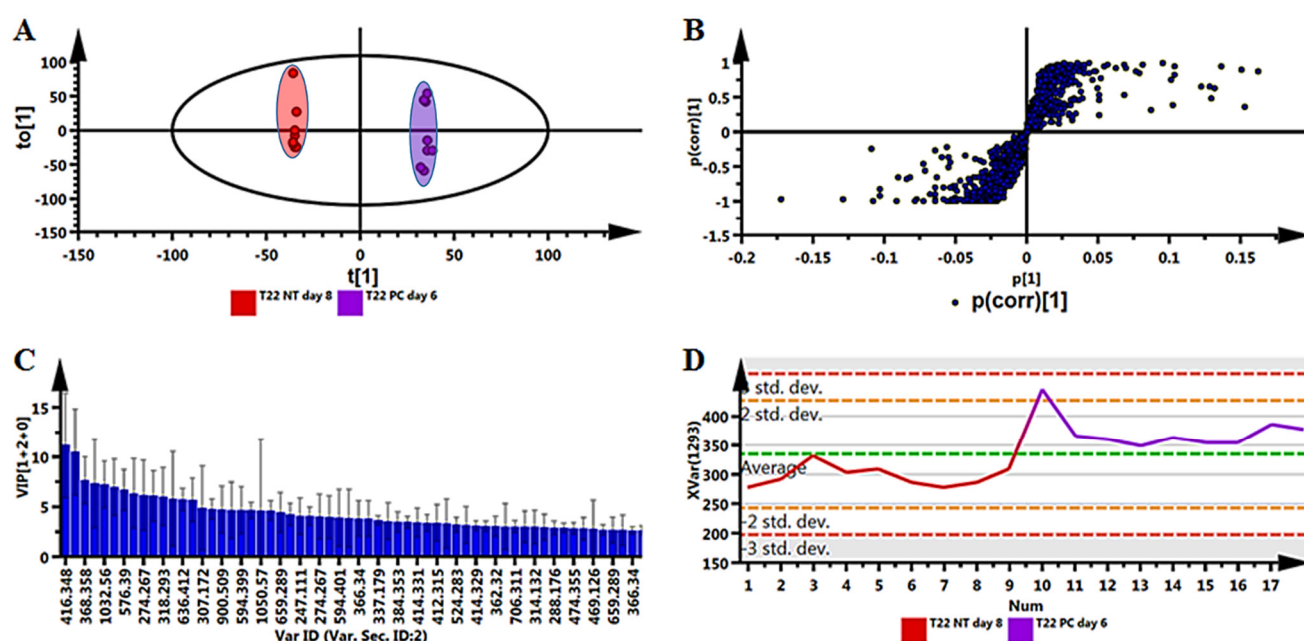

**Figure S13. OPLS-DA modeling and variable/feature selection of root data acquired in ESI<sup>+</sup> mode comparing primed (*Paenibacillus alvei* T22 NT) and primed-challenged (*Paenibacillus alvei* T22 PC) plants. (A) A typical OPLS-DA score separating primed (T22 NT day 8) plants vs. primed-challenged (T22 PC day 6) plants (1 + 2 + 0 components,  $R^2X = 0.67$ ,  $Q^2 = 0.980$ , CV-ANOVA  $p$ -value =  $1.8 \times 10^{-8}$ ). (B) An OPLS-DA loadings S-plot for the same model in (A); only variables with a correlation  $[(p[corr]) \geq |0.6|]$  and covariance  $(p[1] \geq |0.5|)$  were chosen as discriminating variables and identified using the  $m/z$  to generate an elemental composition. (C) Variable importance for the projection (VIP) plot for the same model, pointing mathematically to the importance of each variable in contributing to group separation in the OPLS-DA model. (D) A typical variable trend plot (of the selected variable in VIP and S-plots), displaying the changes of the selected variables across the samples (NT day 8 vs. PC day 6). This shows that the selected features significantly discriminate the primed-challenged from primed-unchallenged samples.**
